# Supplementary material for: Bis(rylenedicarboximide)-a,d-1,5-diaminoanthraquinones as unique infrared absorbing dyes
Source: Royal Society of Chemistry journal article supplement (doi:10.1039/b208855j), 2002-01-01
Supplement: b208855j.doc [file b208855j.doc]

# Supplementary data

# Bis(rylenedicarboximide)-a,d-1,5-diaminoanthraquinone as unique infrared absorbing dyes

# Christopher Kohl, Stefan Becker and Klaus Müllen*

# Max-Planck-Institut für Polymerforschung, Ackermannweg 10, D-55128 Mainz, Germany. Fax: +49 (6131) 379 350; Tel: +49 (6131) 379 150; E-mail:muellen@mpip-mainz.mpg.de

**General procedure for the preparation of amino-substituted rylenedicarboximide derivatives:** In a typical procedure, a Schlenk flask was charged with rylenedicarboximide (bromo-substituted in *peri* position) (5.0 mmol), 1,5-diaminoanthraquinone (2.7 mmol), NaO*t-*Bu (7.0 mmol), [Pd2(dba)3] (0.0125 mmol, 0.5 mol % Pd), BINAP (0.0375 mmol), and toluene (300 mL) under argon. The mixture was heated to 80 °C with stirring for 16 h, cooled to room temperature, filtered, and the solvent removed under reduced pressure. The crude product was purified further by column chromatography (silica gel, methylene chloride).

N,N´-Bis[4-(N-(2,6-diisopropylphenyl)naphthalene-1,8-dicarboximide)yl]-1,5-diaminoanthraquinone: The general procedure using N-(2,6-diisopropylphenyl)-4-bromonaphthalene-1,8-dicarboximide gave 2.18 g (92 %) of the title compound as a brown solid. M. P. = 245 °C; 1H NMR (500 MHz, C2D2Cl4, 120 °C): δ = 11.87 (s, 2 H, NH), 8.62 (d, 3J = 8.0 Hz, 2 H), 8.59 (d, 3J = 7.9 Hz, 2 H), 8.48 (d, 3J = 7.7 Hz, 2 H), 8.44 (d, 3J = 8.0 Hz, 2 H), 8.40 (m, 4 H), 8.30 (d, 3J = 7.8 Hz), 7.90 (d, 3J = 7.6 Hz), 7.77 (d, 3J = 8.1 Hz), 7.41 (t, 3J = 7.9 Hz), 7.27 (d, 3J = 7.9 Hz, 4 H), 2.75 (sept, 3J = 6.7 Hz, 4 H, CH isopropyl), 1.17 ( d, 3J = 6.7, 24 H, CH3 isopropyl); 13C NMR (j-modulated spinecho; 125 MHz, C2D2Cl4, 120 °C): δ = 186.3 (C=O anthraquinone), 164.2 (C=O dicarboximide), 163.6 (C=O dicarboximide), 147.4(q), 146.2 (q), 143.1 (q), 136.5 (q), 135.6 (t), 132.4 (t), 132.2 (t), 131.7 (q), 130.7 (q), 129.3 (t), 128.5 (t), 127.4 (q), 124.0 (t), 121.3 8t), 120.2 (t), 119.1 (q), 118.4 (t), 116.8 (q), 29.4 (CH isopropyl), 24.1 (CH3 isopropyl); IR (KBr): ν = 3066, 2964, 1706, 1668, 1629, 1571, 1521, 1458, 1363, 1295, 1259, 1180, 1144, 1006, 777 cm-1; UV/Vis (CHCl3): λmax (ε) = 426 (18400), 531 nm (13200 M-1 cm-1); MS (FD, 8 kV): m/z (%): 948.4 (100) [M]+;anal. calcd for C62H52N4O6: C 78.46, H 5.52, N 5.90; found C 78.65, H 5.25, N 5.77

**N,N´-Bis[9-(N-(2,6-diisopropylphenyl)-1,6-bis(4-*tert*-octylphenoxy)perylene-3,4-dicarboximide)yl]-1,5-diaminoanthraquinone:** The general procedure using N-(2,6-diisopropylphenyl)-9-bromo-1,6-bis(4-*tert*-octylphenoxy)perylene-3,4-dicarboximide gave 4.73 g (94 %) of the title compound as a violet solid. M. P. = 301 °C; 1H NMR (700 MHz, C2D2Cl4, 90 °C): δ = 11.87 (s, 2 H, NH), 9.42 (d, 3J = 7.4 Hz, 2 H), 9.37 (d, 3J = 7.4 Hz, 2 H), 8.31 (d, 3J = 8.4 Hz, 2 H), 8.27 (s, 2 H), 8.26 (s, 2 H), 7.84 (d, 3J = 8.4 Hz, 2 H),7.71 (d, 3J = 8.4 Hz, 2 H), 7.66 (t, 3J = 8.4 Hz, 2 H), 7.53-7.45 (m, 4 H), 7.39-7.35 (m, 10 H), 7.22 (d, 3J = 8.0 Hz, 4 H), 7.09-7.06 (m, 8 H), 2.68 (sept, 3J = 7.0 Hz, 4 H, CH isopropyl), 1.71 (s, 8 H), 1.38 (s, 24 H), 1.10 (d, 3J = 7.0 Hz, 24 H, CH3 isopropyl), 0.75 (s, 36 H); H,H COSY NMR (700 MHz, C2D2Cl4, 90 °C): coupling of  = (9.42, 7,66), (9.37, 7.71), (8.31, 7.66), (7.84, 7.53-7.45), (7.66, 9.42, 8.31), (7.39-7.35, 7.22, 7.09-7.06), (7.22, 7.39-7.33); 13C NMR (j-modulated spinecho; 175 MHz, C2D2Cl4, 90 °C): δ = 186.09 (C=O anthraquinone), 164.57 (C=O dicarboximide), 164.37 (C=O dicarboximide), 154.82 (q), 154.55 (q), 149.59 (q), 147.98 (q), 146.90 (q), 138.87 (q), 137.13 (q), 136.61 (q), 132.81 (q), 132.21 (q), 131.88 (q), 130.71 (t), 130.61 (q), 129.32 (t), 128.50 (t), 128.43 (q), 128.24 (t), 125.81 (q), 125.56 (t), 125.35 (q), 125.28 (q), 124.51 (q), 122.89 (q), 122.17 (q), 122.02 (t), 121.16 (t), 120.01 (t), 119.38 (t), 116.39 (t), 58.52 (q), 39.70 (q), 33.70 (CH2), 33.67 (CH3), 32.80 (CH3), 30.44 (CH isopropyl), 25.45 (CH3 isopropyl); IR (KBr): ν = 2956, 2362, 2335, 1734, 1702, 1684, 1670, 1653, 1635, 1616, 1575, 1559, 1540, 1522, 1506, 1472, 1464, 1457, 1437, 1419, 1323, 1255, 1210, 1173, 874, 669 cm-1; UV/Vis (CHCl3): max () = 556 nm (62500 M-1 cm-1); MS (FD, 8 kV): m/z (%): 2014.7 (100) [M]+; anal. calcd for C138H140N4O10: C 82.27, H 7.00, N 2.78; found C 81.96, H 6.94, N 2.77

N,N´-Bis(4-N-(2,6-diisopropylphenyl)naphthalene-1,8-dicarboximide)-a,d-1,5-diaminoanthraquinone: A Schlenk tube was charged with K2CO3 (0.5 g, 3.6 mmol), ethanolamine (1.7 mL) (dried over molecular sieves) and N,N´-bis[4-(N-2,6-diisopropylphenyl)naphthalene-1,8-dicarboximide)yl]-1,5-diaminoanthraquinone (0.3 g, 0.3 mmol). The mixture was stirred at 125 °C for 5 days under argon, cooled to room temperature, diluted with methanol, filtered and washed with additional amounts of methanol. The dried solid was recrystallized with 1,2,4-trichlorobenzene. Further purification by column chromatography (silica gel, methylene chloride/acetone 9.7 : 0.3) is optional; however, it is usually not necessary to obtain the title compound as a green solid 216 mg (72 %). M. P. = 285 °C; 1H NMR (500 MHz, C2D2Cl4, 120 °C):  = 13.11 (s, 2 H, NH), 8.62 (d, 3J = 7.9 Hz, 2 H), 8.20 (d, 3J = 8.2 Hz, 2 H), 8.04 (d, 3J = 7.9 Hz, 2 H), 7.39 (t, 3J = 7.6 Hz, 2 H), 7.26 (d, 3J = 7.6 Hz, 4 H), 7.15 (d, 3J = 7.9 Hz, 2 H), 2.69 (sept, 3J = 6.7 Hz, 4H, CH isopropyl), 1.14 (d, 3J = 6.7 Hz, 24 H, CH3 isopropyl);H,H COSY NMR (500 MHz, C2D2Cl4, 120 °C): coupling of  = (8.62, 8.04), (8.52, 7.15), (8.51, 8.20), (7.39, 7.26), (2.69, 1.14); 13C NMR (j-modulated spinecho; 125 MHz, C2D2Cl4, 120 °C):  = 185.07 (C=O, anthraquinone), 163.78 (C=O, dicarboximide), 163.55 (C=O, dicarboximide), 146.15 (q), 142.10 (q), 141.22 (q), 135.96 (q), 135.00 (q), 134.55 (t), 133.12 (t), 132.14 (q), 131.68 (q), 130.20 (t), 129.17 (t), 127.08 (q), 124.02 (t), 121.94 (q), 121.78 (t), 121.51 (q), 116.25 (t), 115.84 (q), 114.30 (q), 108.68 (t), 29.40 (CH isopropyl), 24.09 (CH3 isopropyl); IR (KBr):  = 3176, 3068, 2962, 2929, 2867, 1697, 1654, 1621, 1589, 1575, 1531, 1496, 1454, 1386, 1350, 1306, 1278, 1261, 1178, 1138, 1053, 984, 854, 833, 756 cm-1; UV/Vis (CHCl3): max () = 440 (15800), 735 (16000), 778 nm (15900 M-1 cm-1); MS (FD, 8 kV): m/z (%): 946.4 (100) [M]+; anal. calcd for C62H48N4O6: C 78.8, H 5.12, N 5.93; found C 78.4, 5.26, N 5.90

N,N´-Bis(9-N-(2,6-diisopropylphenyl)-1,6-bis(4-*tert*-octylphenoxy)perylene-3,4-dicarboximide)-a,d-1,5-diaminoanthraquinone: A Schlenk tube was charged with NaO*t-*Bu (144 mg, 1.5 mmol), DBN (248 mg, 2.0 mmol), diglyme (5 mL), and N,N´-bis[9-(N-2,6-diisopropylphenyl)-1,6-bis(4-*tert*-octylphenoxy)perylene-3,4-dicarboximide)yl]-1,5-diaminoanthraquinone (0.5 g, 0.25 mmol). The mixture was stirred at 130 °C for 16 h under argon, cooled to room temperature, precipitated by water, filtered and washed with excess of water. The crude product was further purified by column chromatography (silica gel, methylene chloride) to obtain the title compound in analytical purity as a blue solid 354 mg (71 %). M. P. = > 400 °C; 1H NMR (700 MHz, C2D2Cl4, 100 °C):  = 12.78 (s, 2 H, NH), 9.24 (d, 3J = 8.4 Hz, 2 H), 9.04 (d, 3J = 8.4 Hz, 2 H), 8.26 (s, 2 H), 8.04 (s, 2 H), 7.83 (d, 3J = 8.0 Hz, 2 H), 7.72 (d, 3J = 7.5 Hz, 2 H), 7.43 (d, 3J = 7.5 Hz, 2 H), 7.37-7.33 (m, 6 H), 7.28 (d, 3J = 8.8 Hz, 4 H), 7.21 (d, 3J = 8.4 Hz, 4 H), 7.06 (d, 3J = 8.8 Hz, 4 H), 6.87 (d, 3J = 8.8 Hz, 4 H), 6.83 (d, 3J = 7.9 Hz, 2 H), 2.69 (sept, 3J = Hz, 4 H, CH isopropyl), 1.70 (s, 8 H), 1.32 (s, 24 H), 1.10 (d, 3J = Hz, 12 H, CH3 isopropyl), 1.08 (d, 3J = Hz, 12 H, CH3 isopropyl), 0.75 (s, 18 H), 0.70 (s, 18 H); H,H COSY NMR (700 MHz, C2D2Cl4, 100 °C): coupling of  = (9.24, 6.83), (9.04, 7.43), (7.83, 7.72), (7.37-7.33, 7.21), (7.37-7.33, 7.06),(7.28, 6.87);13C NMR (j-modulated spinecho; 175 MHz, C2D2Cl4, 100 °C):  = 185.63 (C=O anthraquinone), 163.43 (C=O dicarboximide), 162.96 (C=O dicarboximide), 153.92 (q), 153.41 (q), 153.08 (q), 152.64 (q), 151.73 (q), 146.46 (q), 145.89 (q), 142.74 (q), 141.11 (q), 137.51 (q), 134.99 (q), 133.87 (q), 132.39 (q), 132.10 (q), 131.39 (q), 130.67(q), 129.84 (q), 129.32 (q), 128.66 (t), 128.10 (t), 128.02 (t), 127.71 (q), 127.58 (q), 127.33 (q), 124.97 (q), 124.67 (q), 124.19 (q), 122.32 (q), 121.26 (q), 121.17 (q), 120.42 (q), 119.33 (q), 118.01 (t), 117.80 (t), 114.85 (t), 113.58 (t), 110.30 (q), 93.90 (q), 57.38 (q), 57.23 (q), 38.54 (q), 38.47 (q), 38.17 (q), 32.60 (q), 32.50 (q), 32.10 (q), 32.06 (t), 32.03 (t), 31.94 (t) , 31.72 (t), 30.01 (q), 29.34 (t), 24.44 (t), 24.22 (t); IR (KBr):  = 2955, 1701, 1583, 1566, 1540, 1502, 1458, 1317, 1296, 1214, 1168, 1056 cm-1; UV/Vis (CHCl3): max () = 618 nm (49500), 1000 nm (42600), 1106 nm (37500 M-1 cm-1); MS (FD, 8 kV): m/z (%): 2014.6 (100) [M]+; anal. calcd for C138H136N4 O10: C 82.44, H 6.82, N 2.79; found C 81.94, H 6.85, N 2.78
